# Supplementary material for: Cyclodextrin Complexation as a Way of Increasing the Aqueous Solubility and Stability of Carvedilol
Source: MDPI journal article supplement (doi:10.3390/pharmaceutics13111746), 2021-10-20
Supplement: s1 [file s1]

# Supplementary Materials: Cyclodextrin complexation as a way of increasing the aqueous solubility and stability of carvedilol

Sébastien Rigaud, David Mathiron, Tarek Moufawad, David Landy, Florence Djedaini-Pilard \* and Frederic Marçon

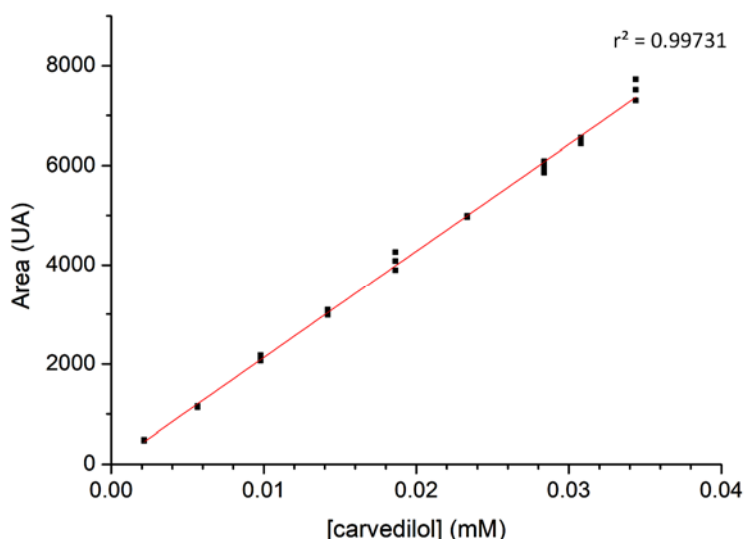

**Figure S1.** Calibration curve obtained at 240 nm in UPLC–UV and used for carvedilol's quantification in solubility studies. 9 points (triplicate) were used, led to an  $r^2$  greater than 99 %.

**Table S1.** Values of the vicinal coupling constant between H15b and H16 protons ( $^3J_{H15b, H16}$ ) measured in different ratio [carvedilol]/[CD] on  $^1H$  NMR spectra (600 MHz) obtained from 0.1M acetate-buffered  $D_2O$  ( $\beta$ CD,  $\gamma$ CD) and 13 mM HCl in  $D_2O$  (DIMEB).

| [carvedilol]/[CD] | $^3J_{H15b, H16}$ (Hz) |             |       |
|-------------------|------------------------|-------------|-------|
|                   | $\beta$ CD             | $\gamma$ CD | DIMEB |
| 1                 | 5.4                    | 5.4         | 5.4   |
| 0.9               | 5.58                   | 5.58        | 5.61  |
| 0.8               | 5.76                   | 5.82        | 5.98  |
| 0.7               | 5.7                    | 5.94        | 6.67  |
| 0.6               | 5.88                   | 6.18        | 7.35  |
| 0.5               | 6                      | 6.36        | 7.67  |
| 0.4               | 6.12                   | 6.54        | 8.29  |
| 0.3               | 6.24                   | 6.66        | 8.72  |
| 0.2               | 6.36                   | 6.78        | 9.16  |
| 0.1               | 6.42                   | 6.96        | 9.41  |

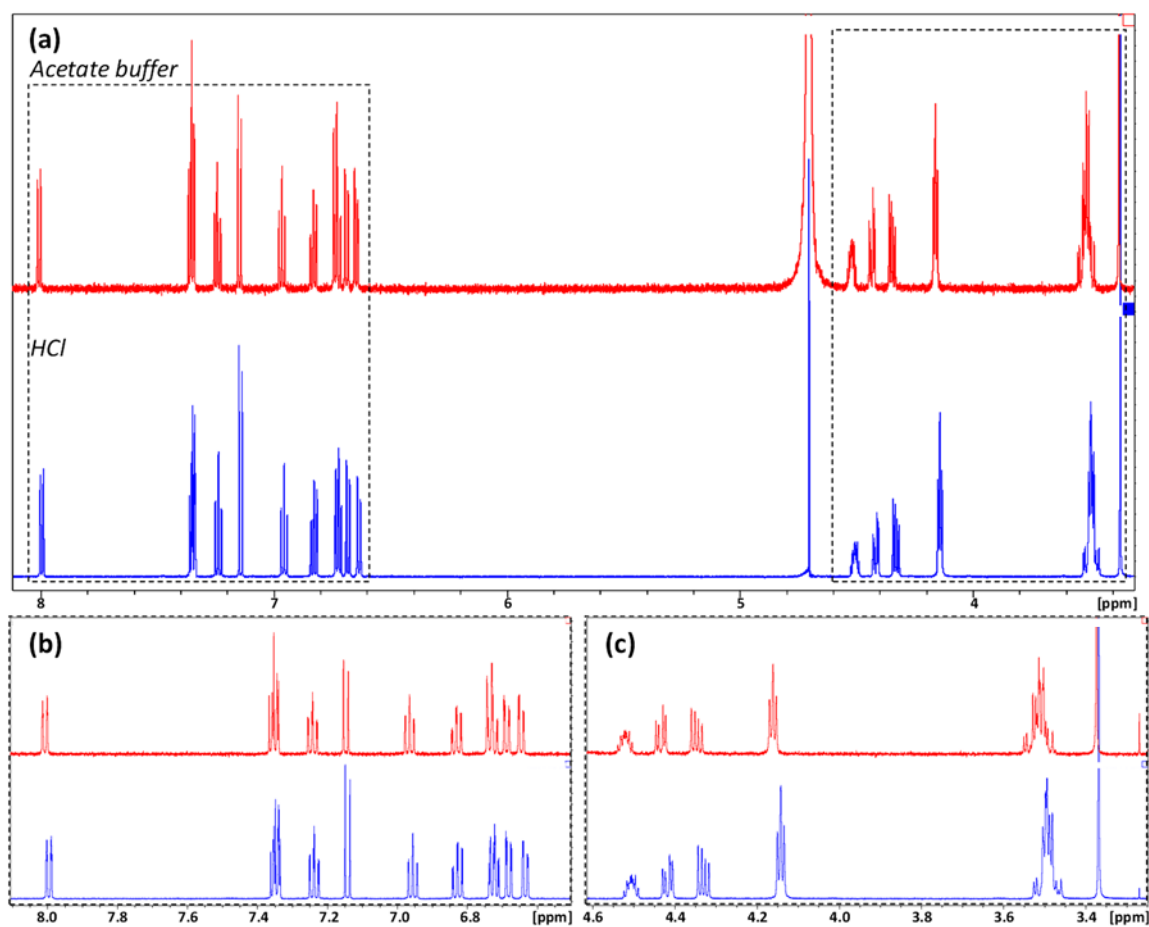

**Figure S2.** Comparison of carvedilol (1 mM)  $^1\text{H}$ -NMR spectra (600 MHz, 298 K) recorded in 0.1 M acetate-buffered  $\text{D}_2\text{O}$  (—) and  $\text{D}_2\text{O}$  with 13 mM HCl (—). (a) Full range  $^1\text{H}$  spectra; (b) Expanded aromatic moieties region (6.5 to 8.1 ppm); (c) Expanded aliphatic moiety region (3.25 to 4.6 ppm).

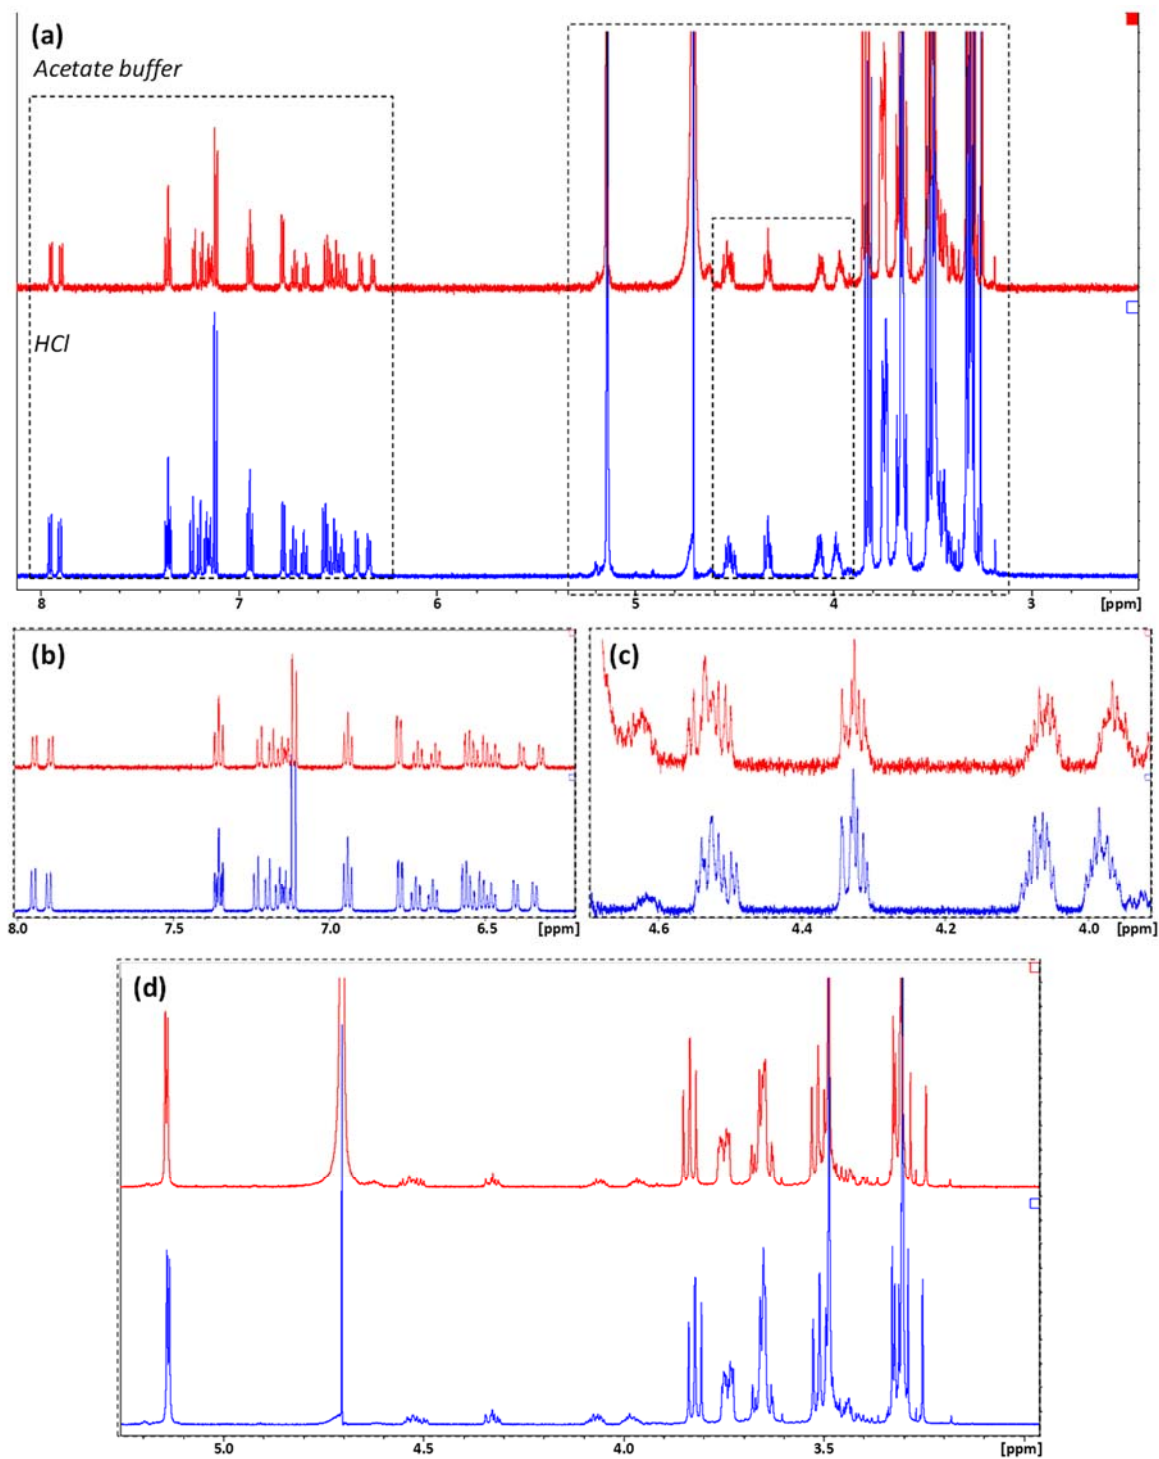

**Figure S3.** Comparison of equimolar mixture of carvedilol (1 mM) and DIMEB  $^1\text{H}$ -NMR spectra (600 MHz, 298 K), recorded in 0.1M acetate-buffered  $\text{D}_2\text{O}$  (—) and in  $\text{D}_2\text{O}$  with 13 mM HCl (—). (a) Full range spectra; (b) Expanded aromatic moieties region (6.2 to 8.0 ppm); (c) Expanded aliphatic moiety region (3.92 to 4.7 ppm); (d) Scale on DIMEB region (3.0 to 5.2 ppm).

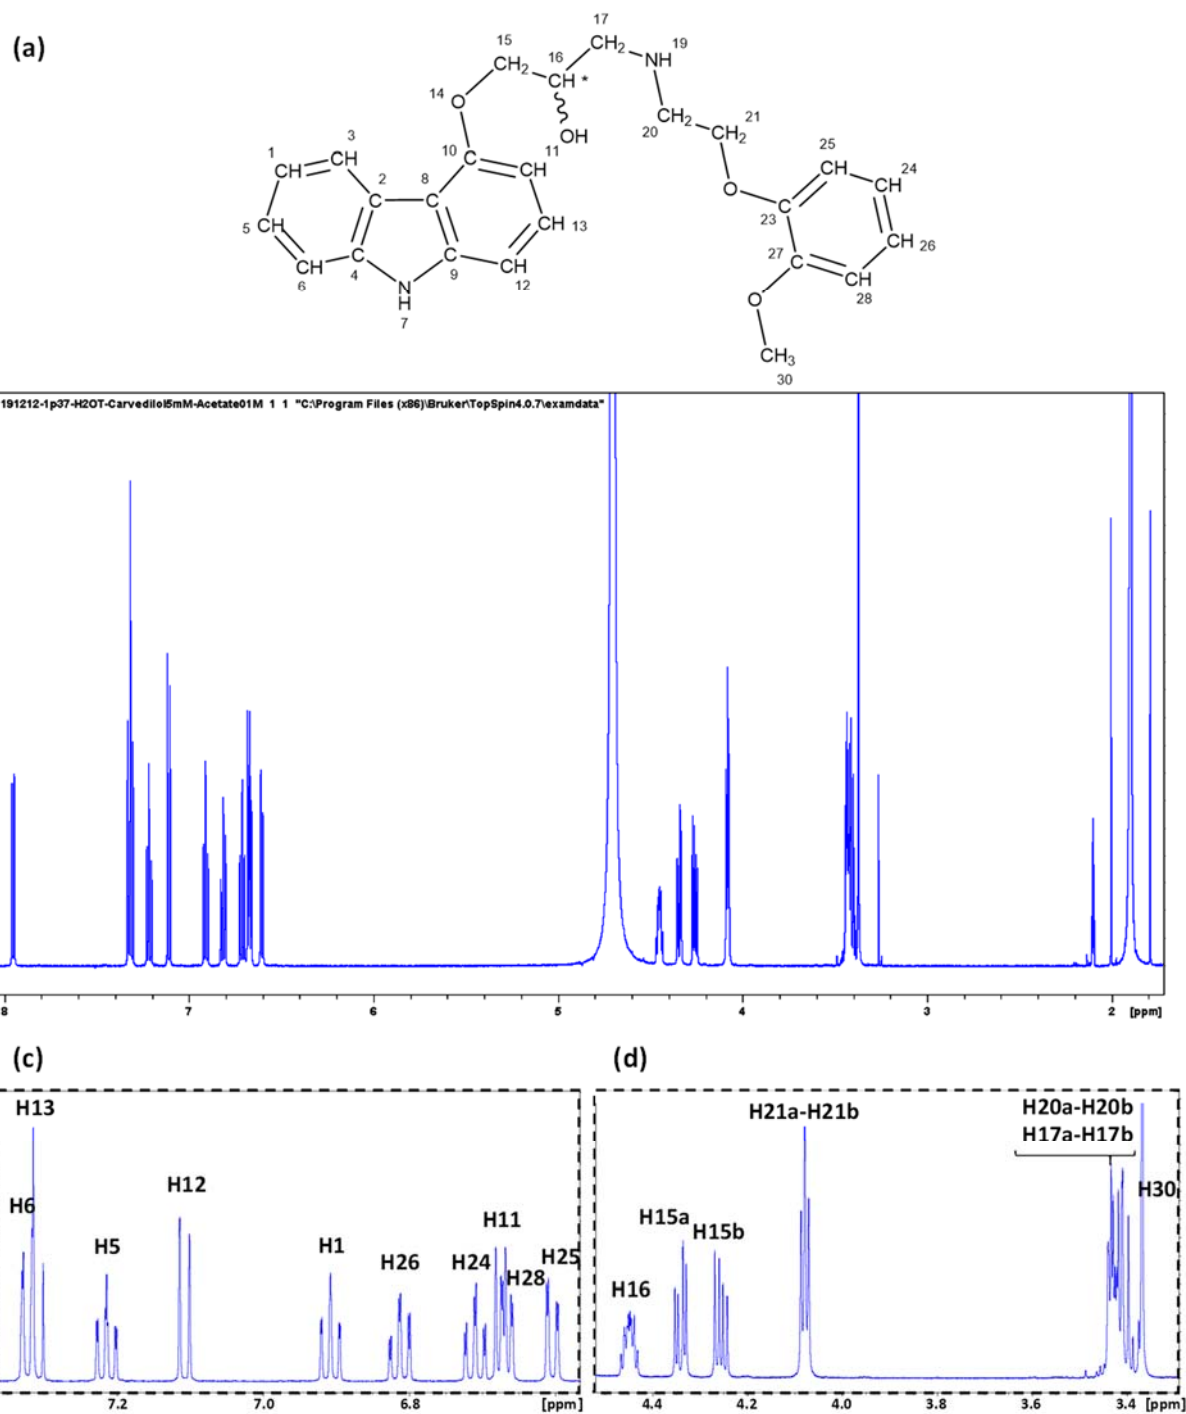

**Figure S4.**  $^1\text{H}$ -NMR spectrum (600 MHz, 298 K) of carvedilol (5 mM) in 0.1M acetate-buffered  $\text{D}_2\text{O}$ . (a) Carvedilol structure numbered; (b) Full range  $^1\text{H}$  spectrum; (c) Expanded aromatics moieties region (6.55 to 7.35 ppm); (d) Expanded aliphatic moiety region (3.30 to 4.52 ppm).  $\delta$  (ppm) and  $J$  (Hz) are reported: 6.90 (H1,  $^3J_{1,3} = 7.85$  Hz,  $^3J_{1,5} = 7.22$  Hz,  $^4J_{1,6} = 0.94$  Hz), 7.95 (H3,  $^4J_{3,5} = 1.17$  Hz), 7.21 (H5), 7.32 (H6,  $^3J_{5,6} = 8.19$  Hz), 6.67 (H11,  $^3J_{11,13} = 7.97$  Hz,  $^4J_{11,12} = 0.40$  Hz), 7.11 (H12,  $^3J_{12,13} = 8.10$  Hz), 7.31 (H13), 4.45 (H16,  $^3J_{16,15a} = 4.02$  Hz,  $^3J_{16,15b} = 5.49$  Hz), 6.71 (H24,  $^3J_{24,25} = 7.95$  Hz,  $^3J_{24,26} = 7.86$  Hz), 6.60 (H25), 6.81 (H26,  $^3J_{26,28} = 7.96$  Hz), 6.67 (H28), 3.37 (H30), 4.34 (H15a,  $^2J_{15a,15b} = 10.30$  Hz), 4.26 (H15b), 4.42 (H17), 3.42 (H20,  $^3J_{20,21} = 5.60$  Hz), 4.08 (H21).

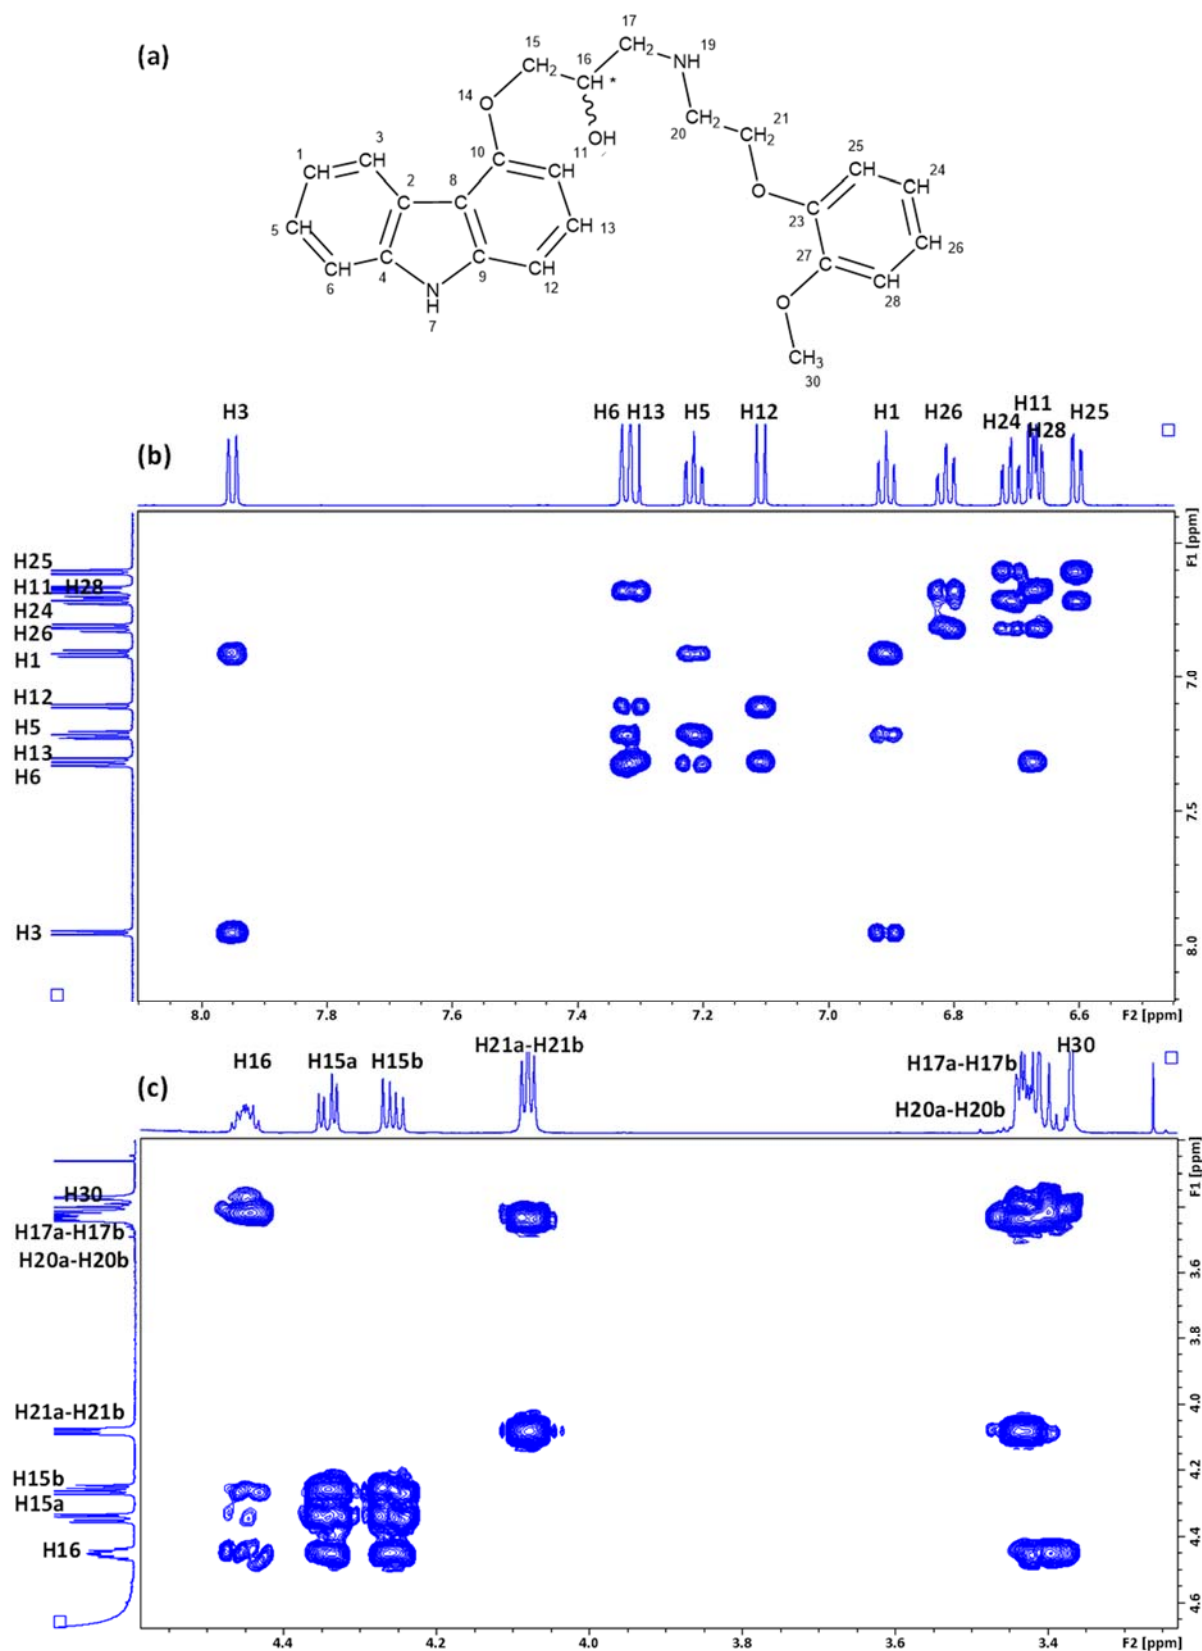

**Figure S5.** COSY experiments (600 MHz, 298 K) of carvedilol (5 mM) in 0.1 M acetate-buffered D<sub>2</sub>O. (a) Carvedilol structure numbered; (b) Expanded aromatics moieties region (6.45 to 8.1 ppm); (c) Expanded aliphatic moiety region (3.25 to 4.6 ppm).

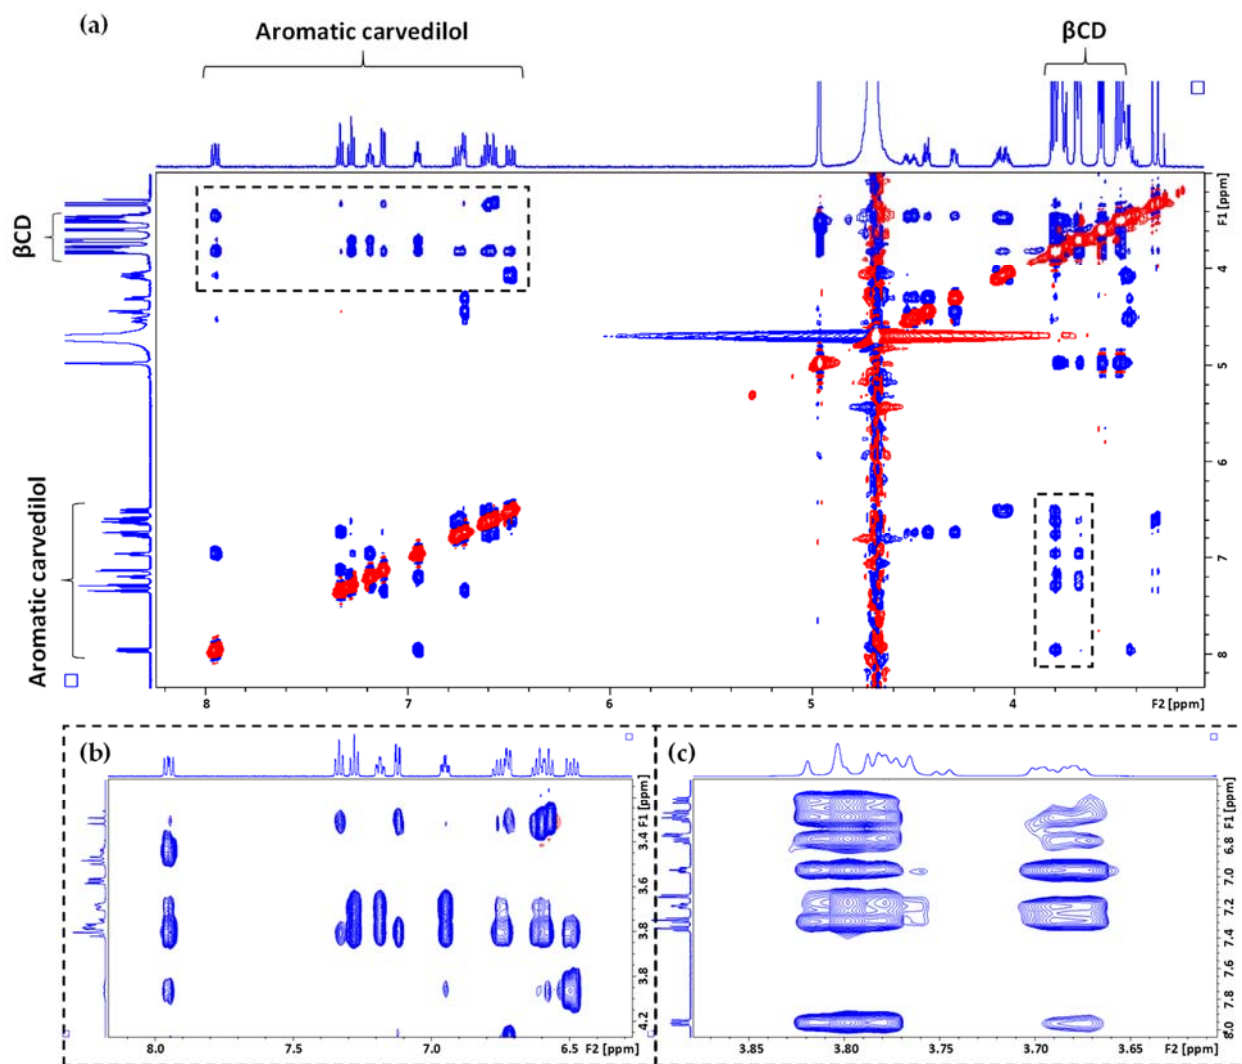

**Figure S6.** (a) A complete 2D ROESY NMR experiment (mixing time = 800 ms) with an equimolar mixture of carvedilol (2 mM) and  $\beta$ CD in 13 mM HCl in  $D_2O$ , with an expanded region in the F2 dimension for (b) aromatic protons in carvedilol and (c) inner protons in  $\beta$ CD.

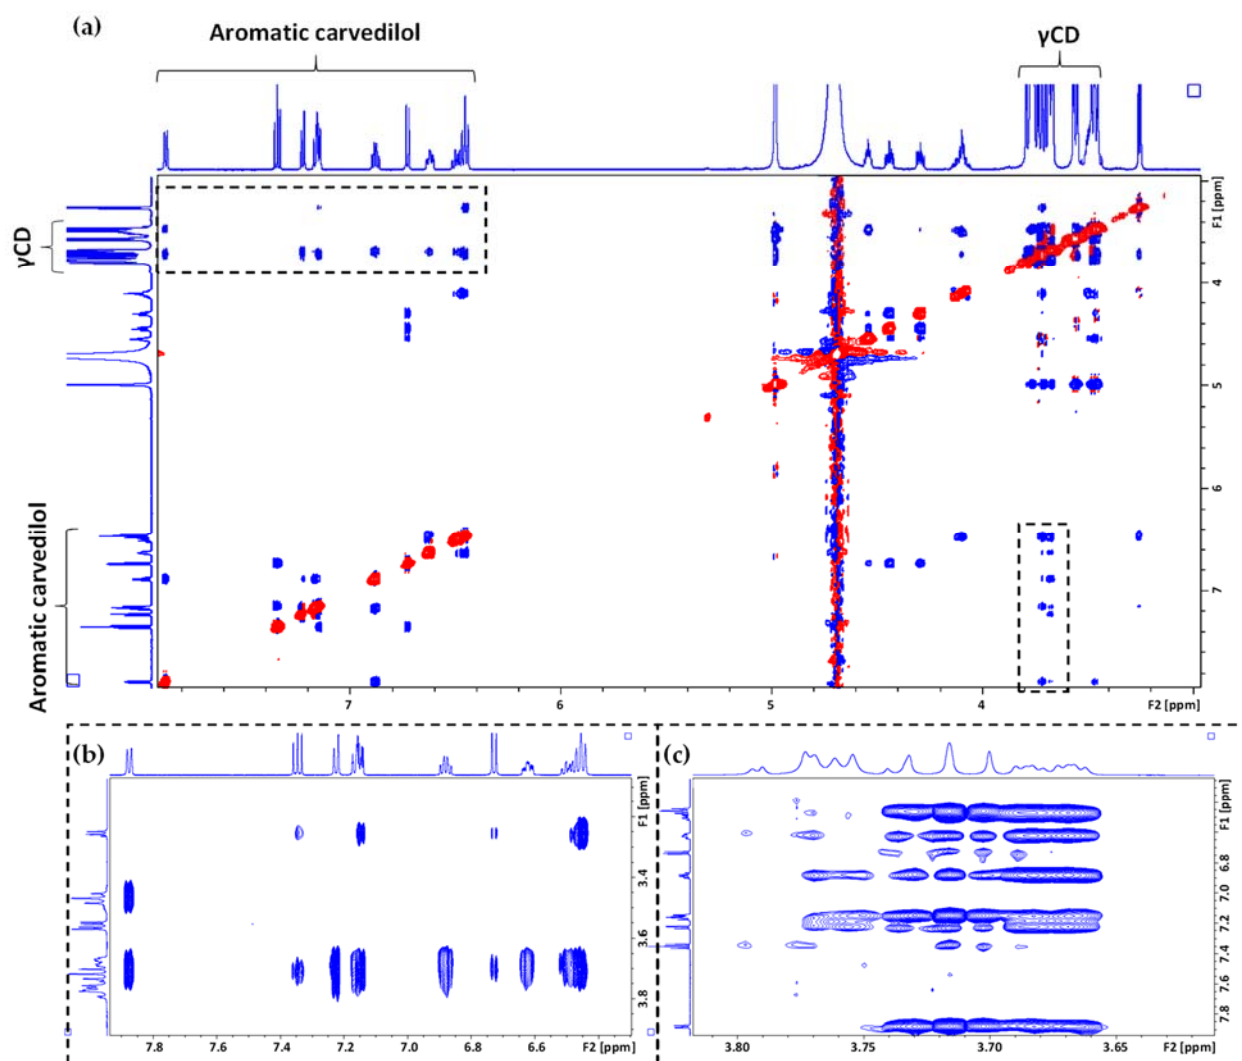

**Figure S7.** (a) A complete 2D ROESY NMR experiment (mixing time = 800 ms) with an equimolar mixture of carvedilol (2 mM) and  $\gamma$ CD in 13 mM HCl in  $D_2O$ , with an expanded region in the F2 dimension for (b) aromatic protons in carvedilol and (c) inner protons in  $\gamma$ CD.

**Table S2.** Relative intensities of dipolar correlations between protons of carvedilol and CDs, as observed in 2D ROESY experiments.

|             |        | Carbazole |     |     |     |     |     |     | Aliphatic |      |     |     |     |     | Methoxyphenyl |     |     |     |
|-------------|--------|-----------|-----|-----|-----|-----|-----|-----|-----------|------|-----|-----|-----|-----|---------------|-----|-----|-----|
|             |        | H1        | H3  | H5  | H6  | H11 | H12 | H13 | H15a      | H15b | H16 | H17 | H20 | H21 | H28           | H26 | H24 | H25 |
| $\beta$ CD  | H1     | -         | -   | -   | -   | -   | -   | -   | -         | -    | -   | -   | -   | -   | -             | -   | -   | -   |
|             | H2     | -         | -   | -   | -   | -   | -   | -   | -         | -    | -   | -   | -   | -   | -             | -   | -   | -   |
|             | H3     | ++        | +++ | ++  | +++ | -   | ++  | +   | -         | +    | -   | ND  | ND  | +   | ++            | ++  | ++  | ++  |
|             | H4     | -         | -   | -   | -   | -   | -   | -   | ND        | ND   | ND  | ND  | ND  | ND  | -             | -   | -   | -   |
|             | H5     | +++       | +   | ++  | +++ | -   | -   | -   | -         | -    | -   | ND  | ND  | -   | -             | +   | +   | -   |
|             | H6     | -         | -   | -   | -   | -   | -   | -   | -         | -    | -   | -   | -   | -   | -             | -   | -   | -   |
| $\gamma$ CD | H1     | -         | -   | -   | -   | -   | -   | -   | -         | -    | -   | -   | -   | -   | -             | -   | -   | -   |
|             | H2     | -         | -   | -   | -   | -   | -   | -   | -         | -    | -   | -   | -   | -   | -             | -   | -   | -   |
|             | H3     | ++        | +++ | +   | +   | +   | +++ | +   | -         | +    | +   | ND  | ND  | +   | +++           | ++  | +   | ND  |
|             | H4     | -         | -   | -   | -   | -   | -   | -   | -         | ND   | ND  | ND  | ND  | ND  | -             | -   | -   | -   |
|             | H5     | +++       | ++  | ++  | ++  | -   | ND  | -   | -         | -    | -   | ND  | ND  | -   | ++            | ++  | ++  | +++ |
|             | H6     | +         | -   | +   | +   | -   | -   | -   | -         | -    | -   | -   | -   | -   | -             | -   | -   | -   |
| DIMEB       | H1     | -         | -   | -   | -   | -   | -   | -   | -         | -    | -   | -   | -   | -   | -             | -   | -   | -   |
|             | H2     | -         | -   | -   | -   | -   | -   | -   | -         | -    | -   | -   | -   | -   | -             | -   | -   | -   |
|             | H3     | ++        | +++ | ++  | ++  | +   | ++  | +   | -         | +    | -   | ND  | ND  | +   | ++            | ++  | +++ | +++ |
|             | H4     | -         | -   | -   | -   | -   | -   | -   | -         | ND   | ND  | ND  | ND  | ND  | -             | -   | -   | -   |
|             | H5     | +++       | +   | +++ | ++  | -   | -   | -   | -         | -    | -   | ND  | ND  | -   | +             | +   | +   | -   |
|             | H6     | +         | -   | +   | -   | -   | -   | -   | -         | -    | -   | ND  | ND  | -   | -             | -   | -   | -   |
|             | CH3(2) | +         | -   | -   | -   | ++  | ++  | ++  | -         | -    | -   | ND  | ND  | -   | -             | +   | +   | -   |
|             | CH3(6) | ++        | -   | -   | ++  | -   | -   | -   | -         | -    | -   | ND  | ND  | -   | -             | -   | -   | -   |

ND: not determined due to overlapping of the  $^1\text{H}$  NMR signals. . (-) no dipolar correlations were observed. (+), (++) and (+++) correspond respectively to low, medium and high intensity of observed dipolar correlation.

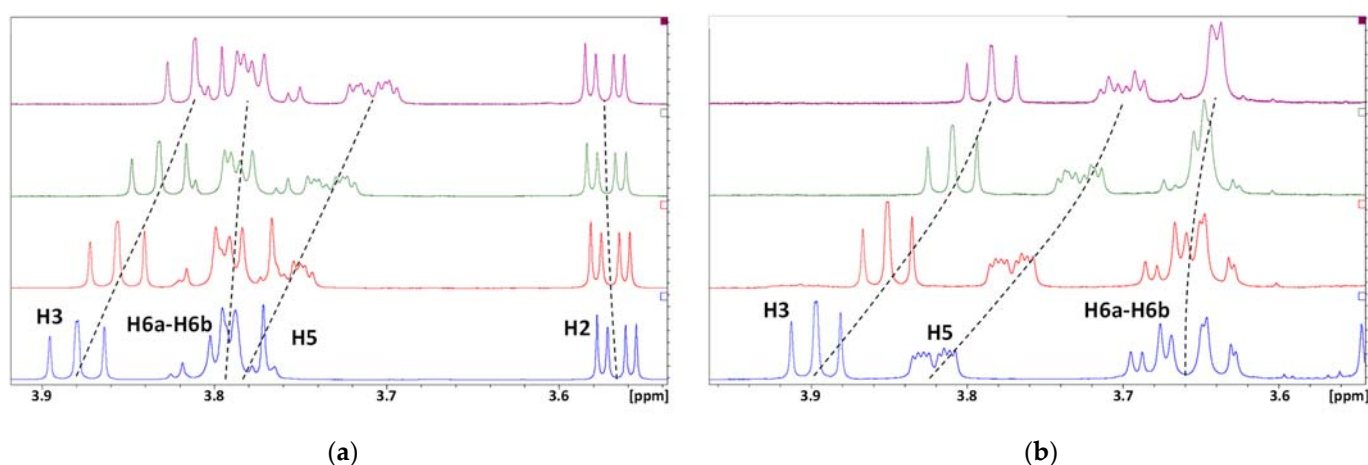

**Figure S8.** Stacking of partial  $^1\text{H}$ -NMR spectra, corresponding to a Job plot for (a) carvedilol/ $\beta$ CD (in 0.1 M acetate-buffered  $\text{D}_2\text{O}$ ) and (b) carvedilol/DIMEB (13 mM HCl in  $\text{D}_2\text{O}$ ) at the following CD molar fractions: 1.0 (—), 0.7 (—), 0.4 (—), 0.1 (—).



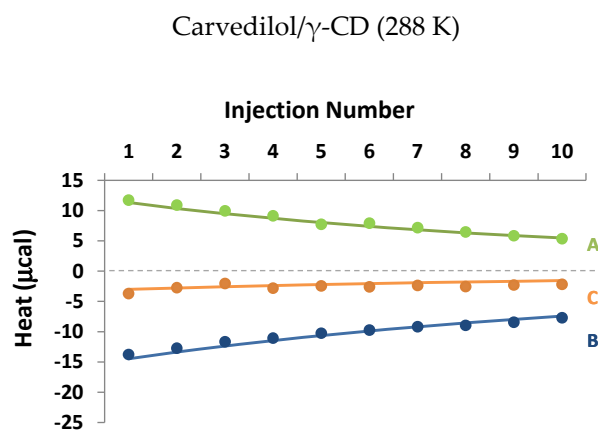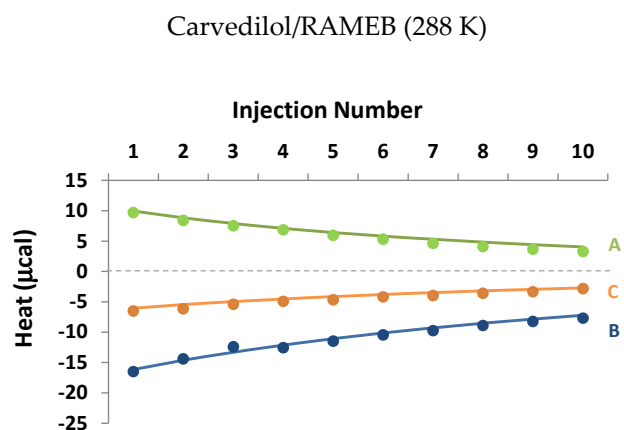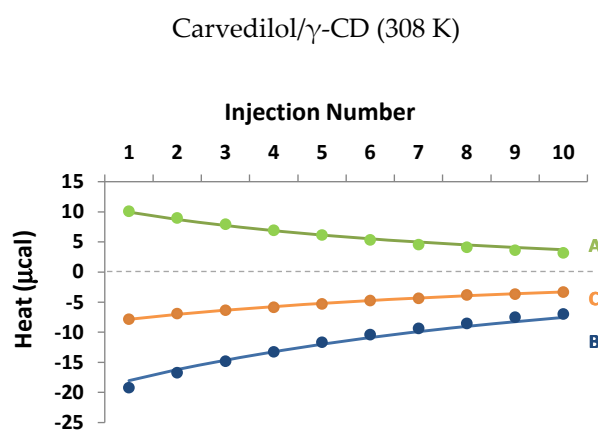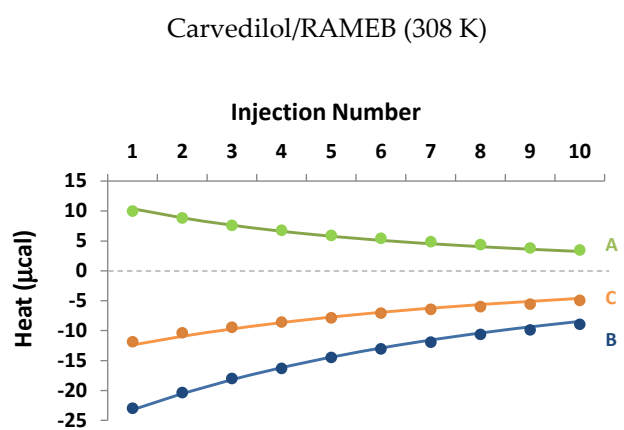

**Figure S9.** Experimental (dots) and theoretical (curves) ITC isotherms obtained for carvedilol/ $\gamma$ CD (left) and carvedilol/RAMEB (right) systems at 288 K (upper part) and 308 K (lower part) in acetate buffer, according to protocol A (0.5 mM carvedilol in the cell and 5 mM CD in the syringe, —), B (buffer in the cell and 1 mM carvedilol + 5 mM CD in the syringe, —) and C (0.5 mM carvedilol in the cell and 1 mM carvedilol + 5 mM CD in the syringe, —).

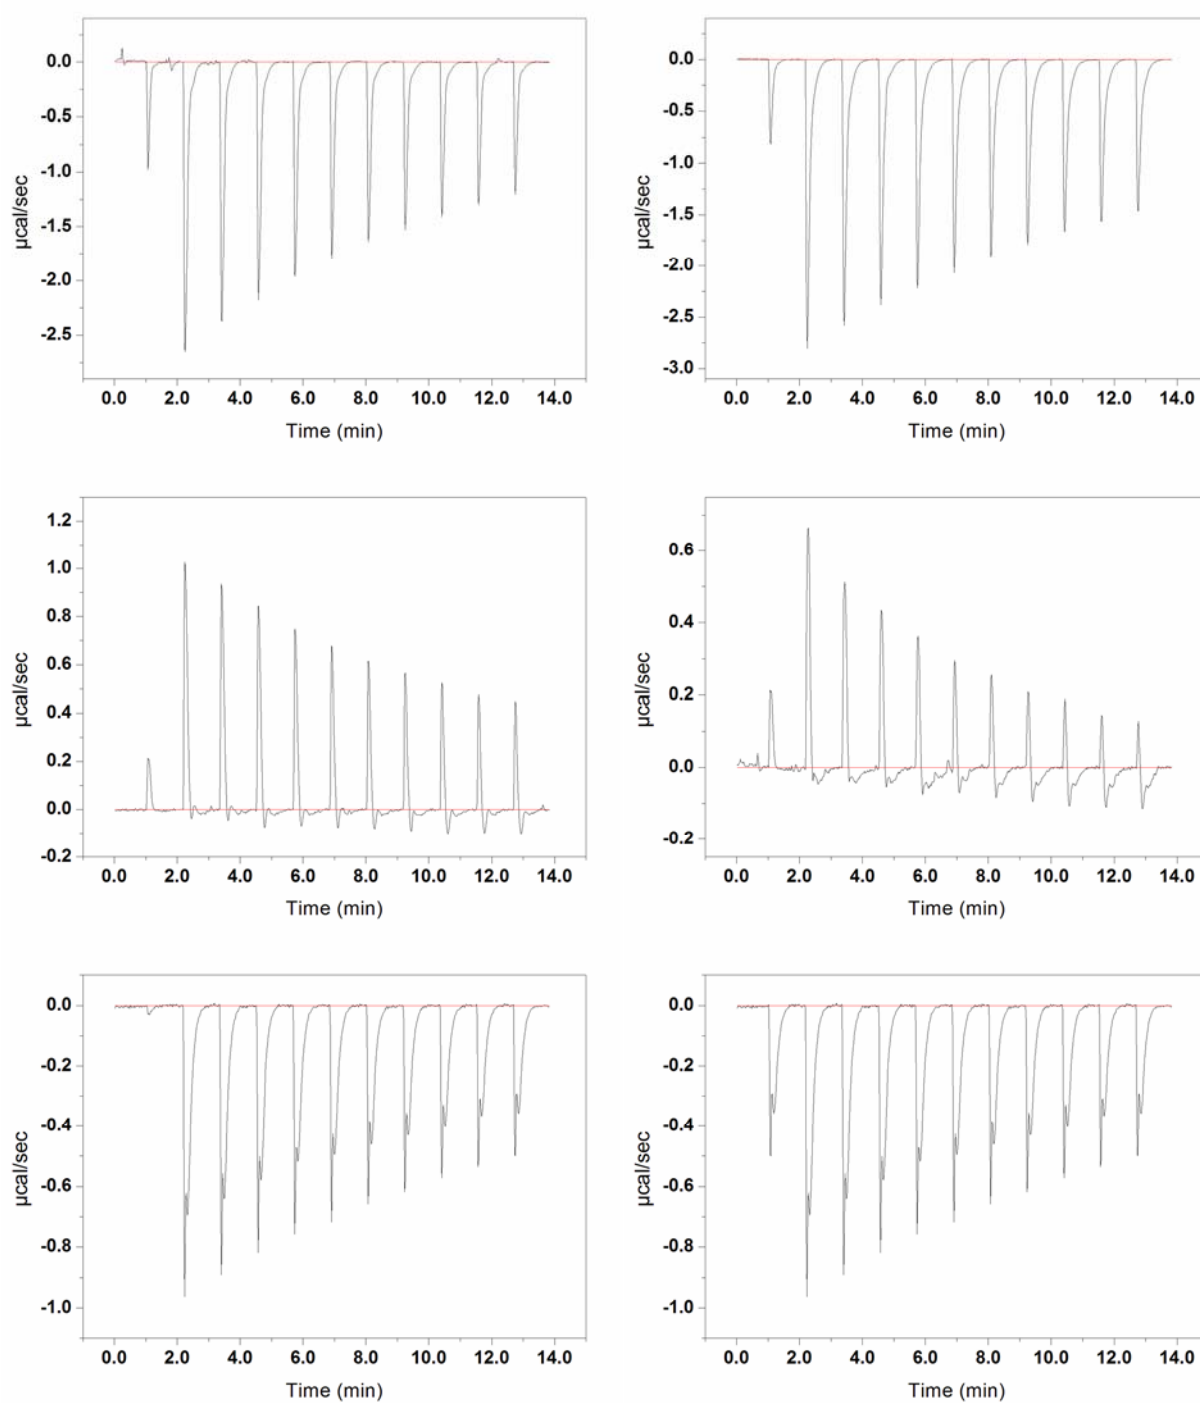

**Figure S10.** Experimental ITC thermograms obtained, before blank subtraction, for carvedilol/ $\gamma$ -CD (left) and carvedilol/RAMEB (right) systems at 288 K in acetate buffer, according to protocol A (0.5 mM carvedilol in the cell and 5 mM CD in the syringe, upper part), B (buffer in the cell and 1 mM carvedilol + 5 mM CD in the syringe, mid part) and C (0.5 mM carvedilol in the cell and 1 mM carvedilol + 5 mM CD in the syringe, lower part).

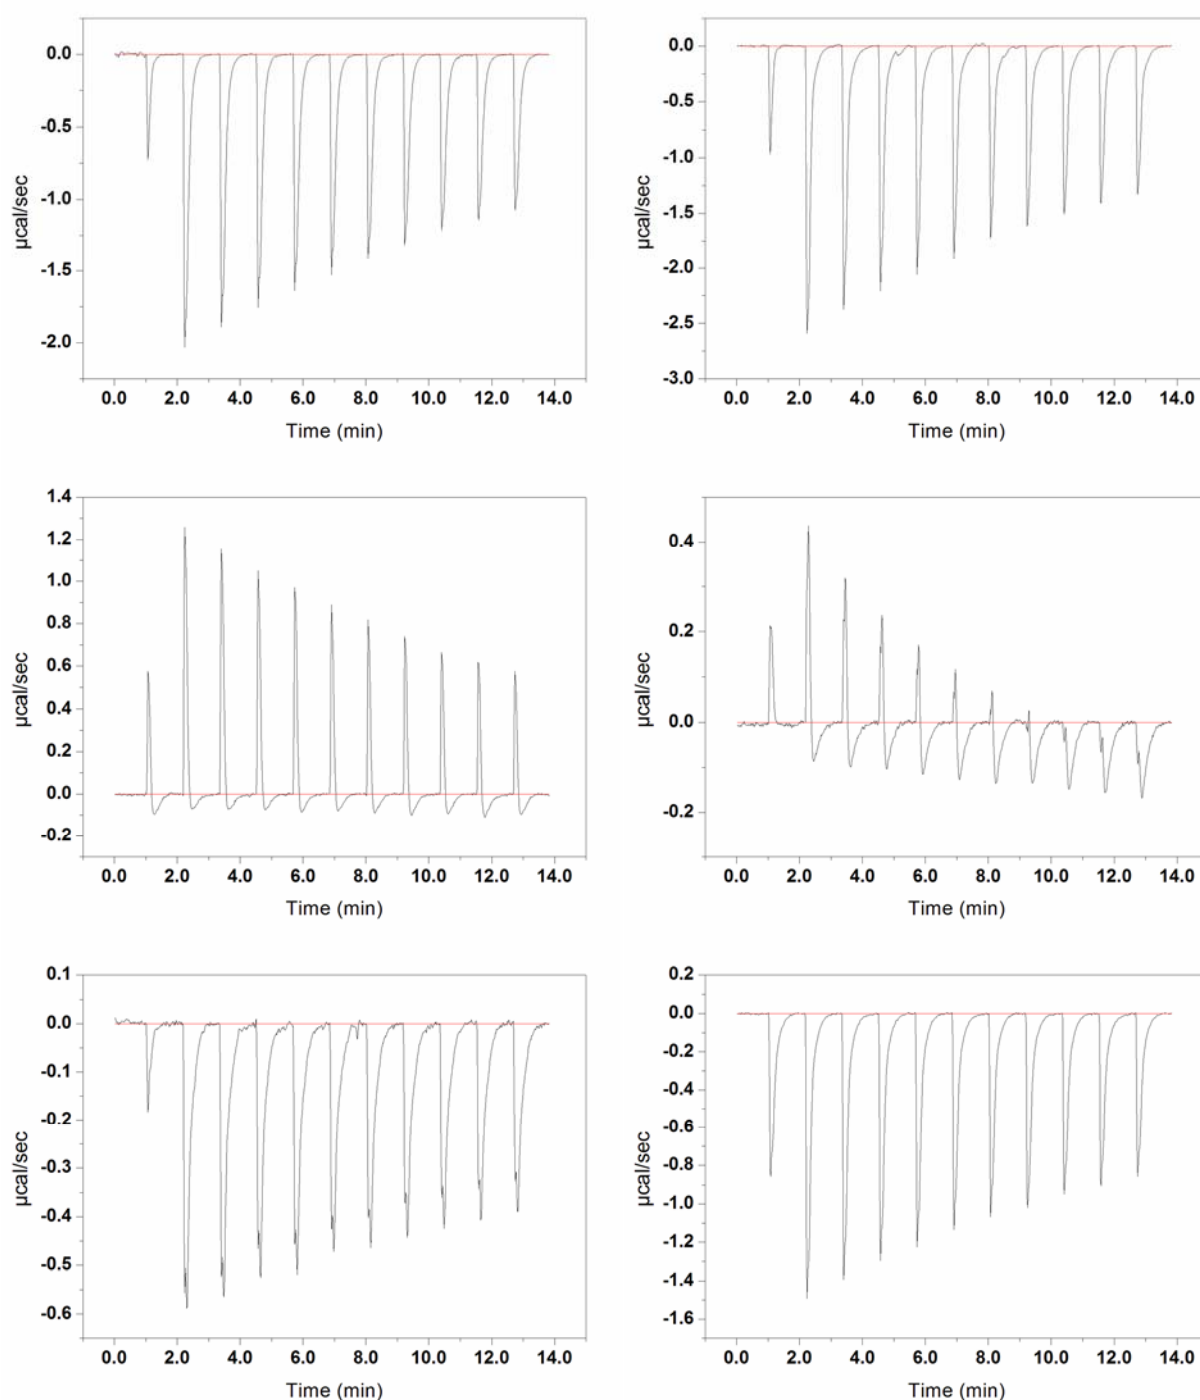

**Figure S11.** Experimental ITC thermograms obtained, before blank subtraction, for carvedilol/ $\gamma$ -CD (left) and carvedilol/RAMEB (right) systems at 298 K in acetate buffer, according to protocol A (0.5 mM carvedilol in the cell and 5 mM CD in the syringe, upper part), B (buffer in the cell and 1 mM carvedilol + 5 mM CD in the syringe, mid part) and C (0.5 mM carvedilol in the cell and 1 mM carvedilol + 5 mM CD in the syringe, lower part).

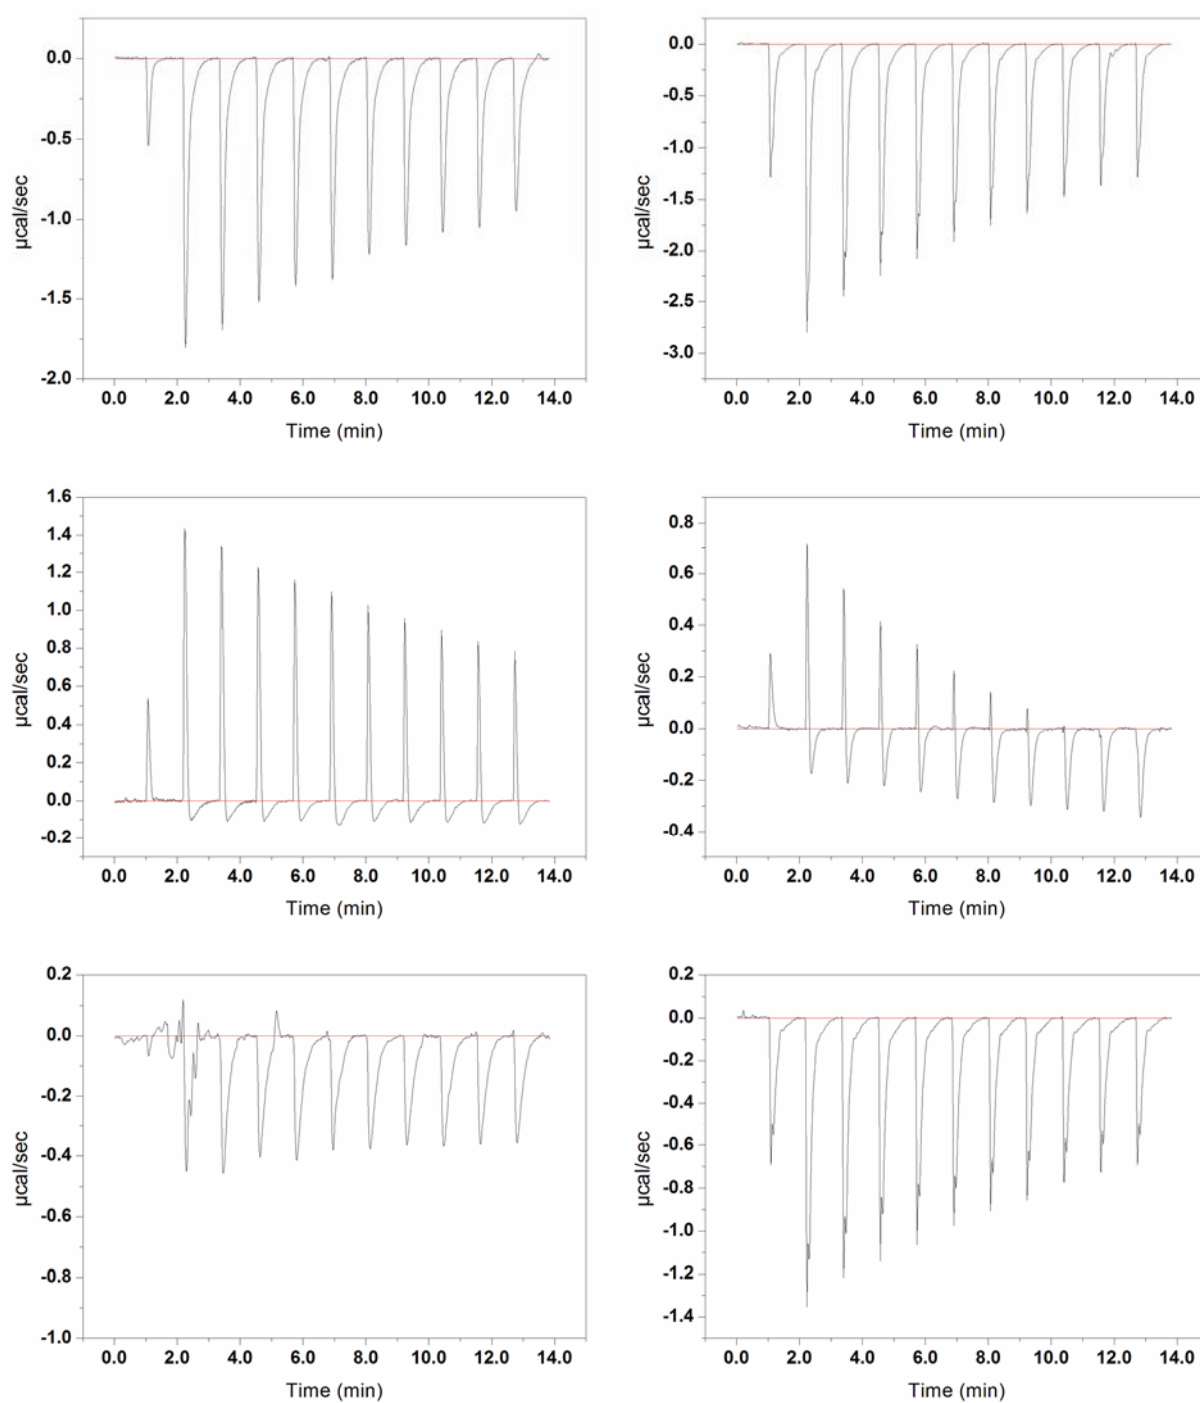

**Figure S12.** Experimental ITC thermograms obtained, before blank subtraction, for carvedilol/ $\gamma$ -CD (left) and carvedilol/RAMEB (right) systems at 308 K in acetate buffer, according to protocol A (0.5 mM carvedilol in the cell and 5 mM CD in the syringe, upper part), B (buffer in the cell and 1 mM carvedilol + 5 mM CD in the syringe, mid part) and C (0.5 mM carvedilol in the cell and 1 mM carvedilol + 5 mM CD in the syringe, lower part).

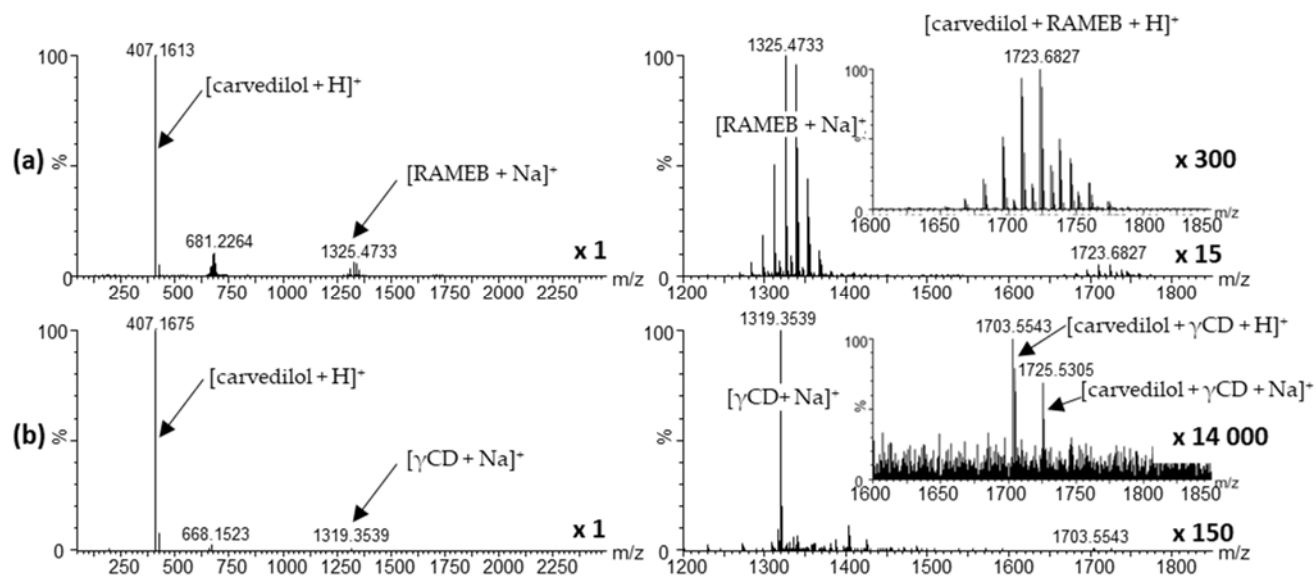

**Figure S13.** Mass spectra (200 scans, 0.2 sec/scan) of an equimolar mixture of carvedilol (8  $\mu$ M) in acetate buffer in presence of (a) RAMEB or (b)  $\gamma$ CD.

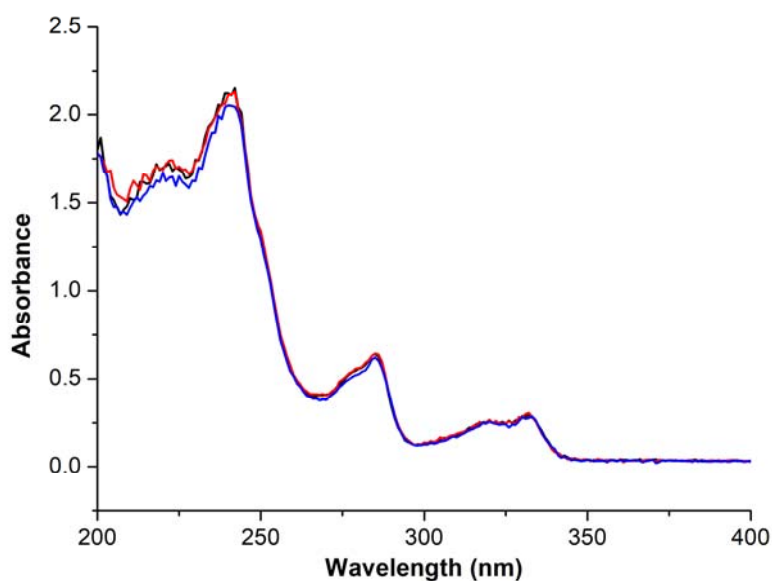

**Figure S14.** UV spectra of carvedilol (0.05 mM) recorded in water with 13 mM HCl in absence of CDs (—) or in presence of 0.5 mM  $\gamma$ CD (—) or RAMEB (—). No longer absorbance was detected between 400 and 800 nm for the three sample analyzed.
